# Supplementary material
Source: Springer Nature journal article supplement (https://www.springermedizin.de/resource/supplementary/12885_2010_2169_MOESM3_ESM.pdf/9460676)

**A****Control****7.1**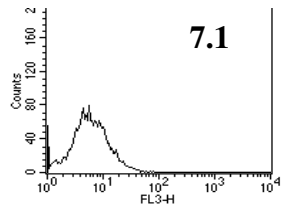**CQ****9.1**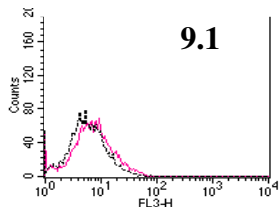**5-FU****11.9**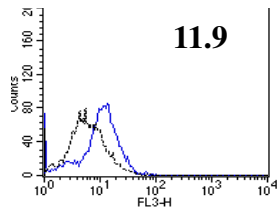**CQ + 5-FU****17.6**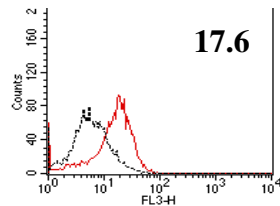

counts ↑  
Mean  
fluorescein  
intensity  
FL-3H →

**B****Control**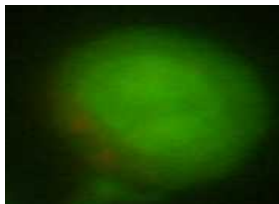**CQ**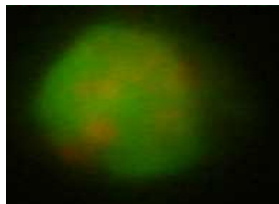**5-FU**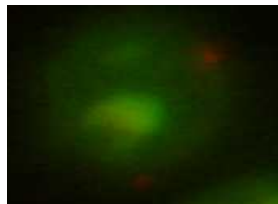**CQ + 5-FU**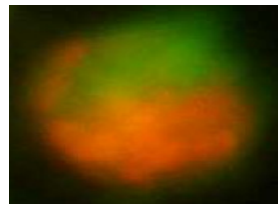

Supplement: MOESM3 [file 9460676]
